# Supplementary material
Source: PubMed Central journal article supplement (PMC5141947)
Supplement: supp_kww080_kww080WangWebMaterialFinal.pdf [file supp_kww080_kww080WangWebMaterialFinal.pdf]

Web Figure 1: Natural spline of the association between distance to A1/A2 roads with 3 df and log CIMT in a fully adjusted model. Shaded region, 95% confidence interval.

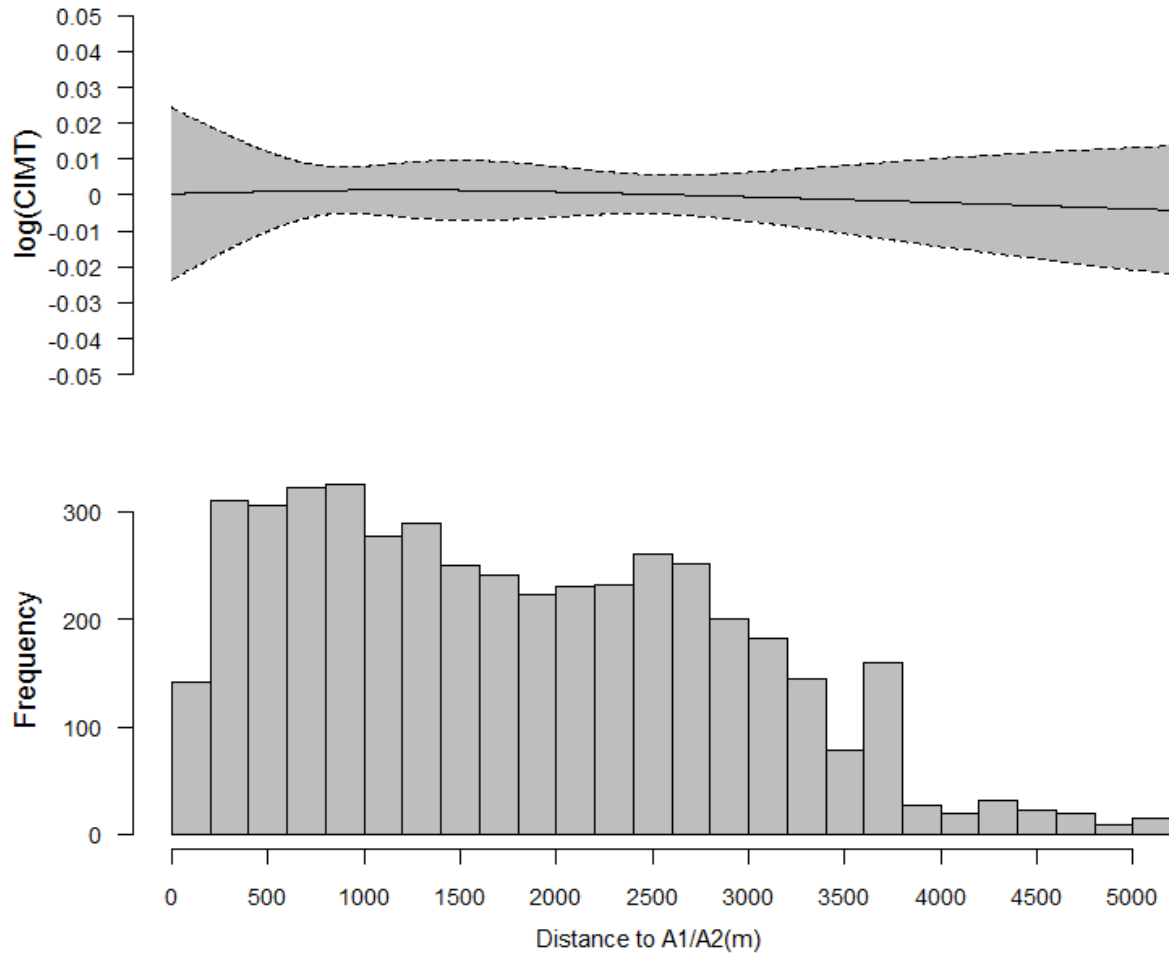

Web Figure 2: Natural spline of the association between distance to A1/A2 roads with 3 df and prevalence ratio for PAD in a fully adjusted model. Shaded region, 95% confidence interval.

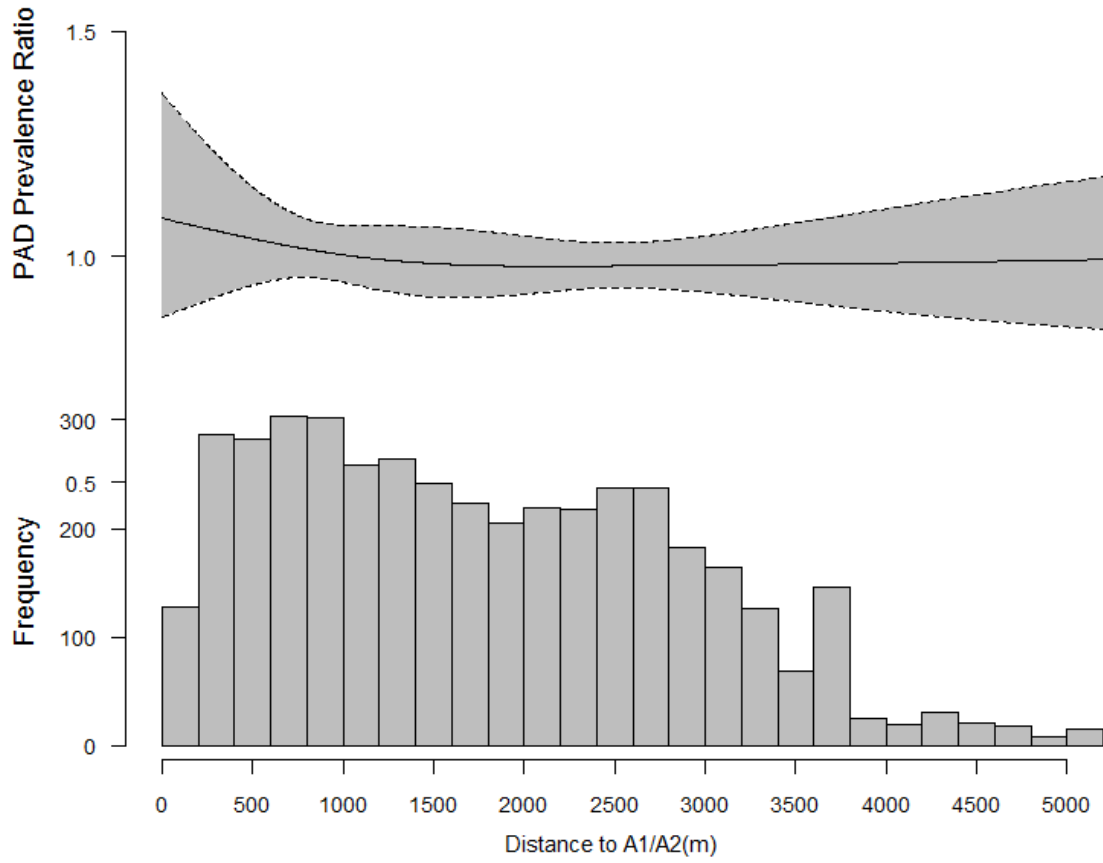

Web Figure 3: Natural spline of the association between distance to A1/A2 roads with 3 df and prevalence ratio for CAC in a fully adjusted model. Shaded region, 95% confidence interval.

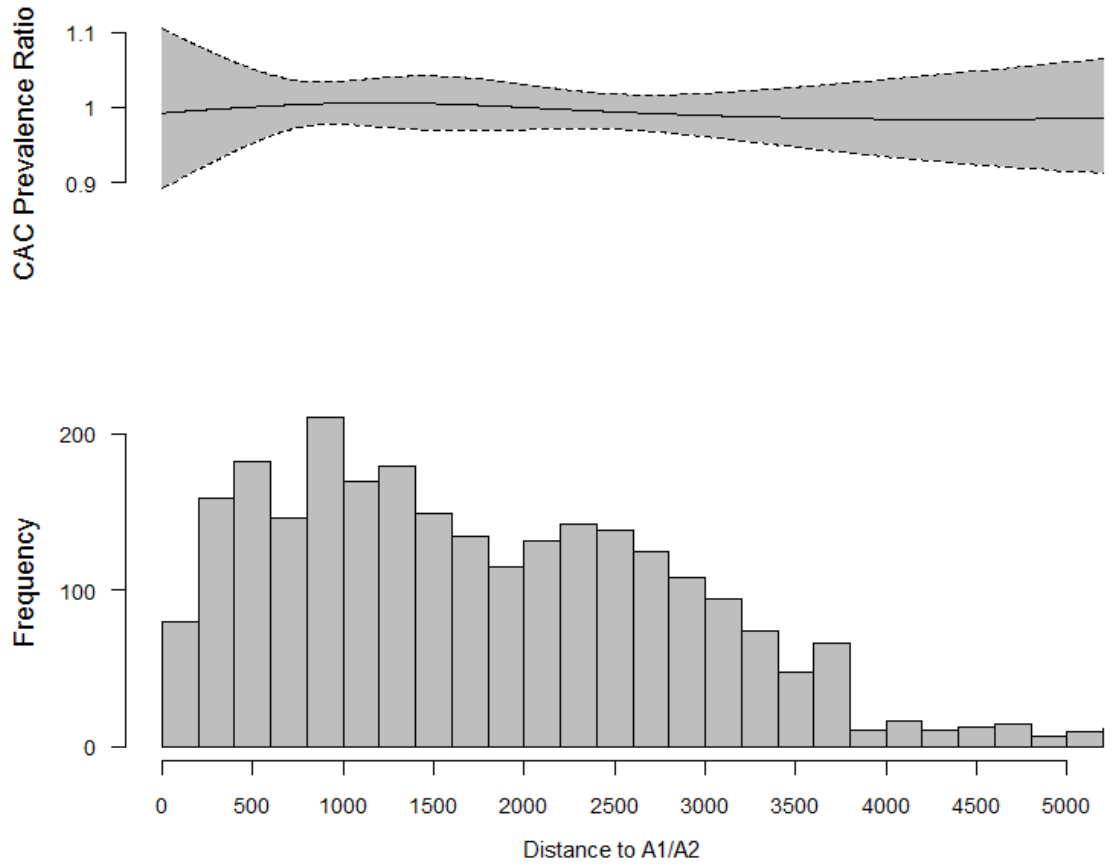

Web Figure 4: Natural spline of the association between distance to A1/A2 roads with 3 df and prevalence ratio for AAC in a fully adjusted model. Shaded region, 95% confidence interval.

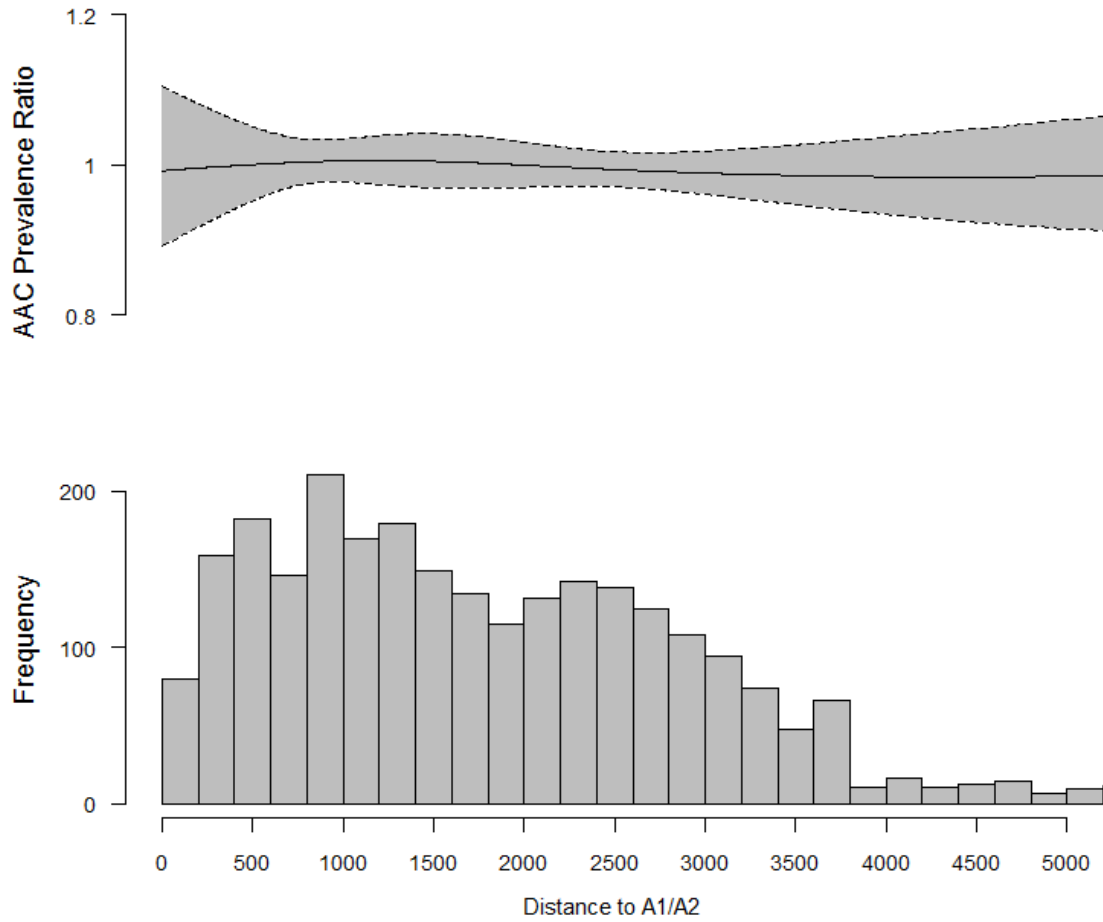

Web Table 1: Baseline characteristics of participants with ABI

| Characteristic                                 | Residential distance to major roadways <sup>b</sup> |                  |                      |                    |
|------------------------------------------------|-----------------------------------------------------|------------------|----------------------|--------------------|
|                                                | All<br>(n=4443) <sup>a</sup>                        | <150 m<br>(n=90) | 150-300 m<br>(n=149) | >300 m<br>(n=4204) |
| Age, years, mean ± SD                          | 55.2 ± 12.6                                         | 55.5 ± 13.0      | 58.4 ± 12.2          | 55.1 ± 12.6        |
| Female, %                                      | 63.5                                                | 68.9             | 63.7                 | 63.4               |
| Body mass index, kg/m <sup>3</sup> , mean ± SD | 31.5 ± 6.9                                          | 32.3 ± 7.6       | 30.5 ± 6.3           | 31.5 ± 6.9         |
| Education, %                                   |                                                     |                  |                      |                    |
| High school or less                            | 37.1                                                | 37.8             | 34.9                 | 37.2               |
| College or vocational school                   | 29.1                                                | 34.4             | 25.6                 | 29.2               |
| Graduate school                                | 33.4                                                | 26.7             | 39.6                 | 33.3               |
| Household income, %                            |                                                     |                  |                      |                    |
| Poor                                           | 12.1                                                | 12.2             | 5.4                  | 12.3               |
| Lower-middle                                   | 20.1                                                | 18.9             | 20.1                 | 20.2               |
| Upper-middle                                   | 25.7                                                | 13.3             | 24.8                 | 26.0               |
| Affluent                                       | 26.8                                                | 27.8             | 32.9                 | 26.5               |
| Alcohol consumption, %                         | 46.0                                                | 41.1             | 38.9                 | 46.4               |
| Ever Smoker, %                                 |                                                     |                  |                      |                    |
| Never                                          | 67.9                                                | 68.9             | 75.8                 | 67.6               |
| Past                                           | 18.7                                                | 11.1             | 14.8                 | 19.0               |
| Current                                        | 12.7                                                | 20.0             | 9.4                  | 12.7               |
| Hypertension, %                                | 61.0                                                | 48.9             | 65.8                 | 61.1               |
| Diabetes mellitus, %                           | 20.5                                                | 15.6             | 19.5                 | 20.6               |
| Hyperlipidemia, %                              | 55.2                                                | 61.0             | 57.0                 | 55.0               |
| History of CHD, stroke and MI, %               | 4.8                                                 | 3.9              | 3.2                  | 4.5                |

|                                          |               |               |               |               |
|------------------------------------------|---------------|---------------|---------------|---------------|
| Fast food outlets, /1,000, mean $\pm$ SD | 1.6 $\pm$ 2.5 | 2.0 $\pm$ 2.6 | 1.8 $\pm$ 2.4 | 1.6 $\pm$ 2.5 |
| Grocery stores, /1,000, mean $\pm$ SD    | 2.7 $\pm$ 4.3 | 4.2 $\pm$ 5.3 | 4.1 $\pm$ 5.1 | 2.6 $\pm$ 4.2 |
| ABI, mean $\pm$ SD                       | 1.1 $\pm$ 0.2 | 1.1 $\pm$ 0.2 | 1.2 $\pm$ 0.2 | 1.1 $\pm$ 0.2 |

---

Abbreviations: ABI, ankle-brachial index; SD, standard deviation.

<sup>a</sup> Percent of missing data: BMI (0.05%), education (0.4%), household income (15.0%), alcohol consumption (0.3%), ever smoker (0.7%), hypertension (0.9%), diabetes (0.9%).

<sup>b</sup> Nearest major roadways = A1 or A2 roads.

Web Table 2: Association between categories of residential distance to nearest major roadway (A1) and carotid intima-media thickness (CIMT) and presence of peripheral arterial disease (PAD) at baseline, and presence of coronary artery calcification (CAC) or aortic artery calcification (AAC) at first follow-up. Estimates represent the relative percent difference in CIMT (95% CI) modeled as a continuous outcome, and prevalence ratios (95% CI) of PAD, CAC or AAC modeled as categorical outcomes.

| Outcome              | Residential Distance to Major Roadways <sup>c</sup> |                     |                   | <i>P</i> <sub>trend</sub> |
|----------------------|-----------------------------------------------------|---------------------|-------------------|---------------------------|
|                      | <150 m                                              | 150-300 m           | >300 m            |                           |
| <b>CIMT</b>          | ( <i>n</i> =32)                                     | ( <i>n</i> =94)     | ( <i>n</i> =4674) |                           |
| Model 1 <sup>a</sup> | -0.70% (-8.07, 7.26)                                | 2.06% (-2.46, 6.79) |                   | 0.52                      |
| Model 2 <sup>b</sup> | 3.68% (-6.21, 14.61)                                | 0.84% (-4.02, 5.96) |                   | 0.53                      |
| Model 3 <sup>c</sup> | 5.57% (-4.42, 16.6)                                 | 0.61% (-4.30, 5.79) | 0 (Ref.)          | 0.48                      |
| Model 4 <sup>d</sup> | 4.64% (-5.47, 15.83)                                | 1.29% (-3.67, 6.51) | 0 (Ref.)          | 0.40                      |
| <b>PAD</b>           | ( <i>n</i> =26)                                     | ( <i>n</i> =89)     | ( <i>n</i> =4328) |                           |
| Model 1 <sup>a</sup> | 0.94 (0.42, 2.12)                                   | 0.86 (0.55, 1.36)   |                   | 0.54                      |
| Model 2 <sup>b</sup> | 1.25 (0.54, 2.96)                                   | 0.79 (0.47, 1.34)   |                   | 0.57                      |
| Model 3 <sup>c</sup> | 1.19 (0.45, 2.86)                                   | 0.82 (0.49, 1.39)   | 0 (Ref.)          | 0.64                      |
| Model 4 <sup>d</sup> | 1.23 (0.53, 2.89)                                   | 0.81 (0.48, 1.37)   | 0 (Ref.)          | 0.61                      |
| <b>CAC</b>           | ( <i>n</i> =12)                                     | ( <i>n</i> =65)     | ( <i>n</i> =2617) |                           |
| Model 1 <sup>a</sup> | 0.98 (0.59, 1.62)                                   | 0.87 (0.65, 1.17)   |                   |                           |
| Model 2 <sup>b</sup> | 0.82 (0.34, 2.02)                                   | 0.93 (0.69, 1.25)   |                   |                           |
| Model 3 <sup>c</sup> | 0.57 (0.17, 1.92)                                   | 0.93 (0.68, 1.27)   | 0 (Ref.)          | 0.41                      |
| Model 4 <sup>d</sup> | 0.54 (0.16, 1.90)                                   | 0.90 (0.66, 1.24)   | 0 (Ref.)          | 0.31                      |
| <b>AAC</b>           | ( <i>n</i> =12)                                     | ( <i>n</i> =65)     | ( <i>n</i> =2616) |                           |
| Model 1 <sup>a</sup> | 0.99 (0.67, 1.46)                                   | 1.00 (0.84, 1.19)   | 0 (Ref.)          | 0.97                      |
| Model 2 <sup>b</sup> | 1.18 (0.82, 1.69)                                   | 1.11 (0.95, 1.29)   | 0 (Ref.)          | 0.13                      |
| Model 3 <sup>c</sup> | 1.09 (0.69, 1.72)                                   | 1.13 (0.96, 1.33)   | 0 (Ref.)          | 0.12                      |
| Model 4 <sup>d</sup> | 1.09 (0.68, 1.74)                                   | 1.12 (0.96, 1.32)   | 0 (Ref.)          | 0.15                      |

<sup>a</sup> Adjusted for age (natural spline, 3 df) and sex.

<sup>b</sup> Additionally adjusted for household income, education, and neighborhood socioeconomic status.

<sup>c</sup> Additionally adjusted for BMI (natural spline, 3 df), smoking, physical activity(natural spline, 3 df), alcohol consumption, history of self-reported and physician-diagnosed coronary heart disease (CHD), myocardial infarction (MI), stroke and carotid angioplasty, and neighborhood food environment (number of fast food restaurants or grocery store within 1.5 miles from residence).

<sup>d</sup> Additionally adjusted for diabetes mellitus, hypertension, and hyperlipidemia.

<sup>e</sup> Nearest major roadways = A1 roads.



Web Table 3: Association between continuous residential distance to nearest major roadway (A1) and carotid intima-media thickness (CIMT) and presence of peripheral arterial disease (PAD) at baseline, and presence of coronary artery calcification (CAC) or aortic artery calcification (AAC) at the first follow-up. Estimates represent the relative percent difference in CIMT (95% CI) and prevalence ratios (95% CI) of PAD, CAC or AAC per 150-m increase in distance when distance is modeled on the natural scale or per doubling increase in distance when distance is modeled on a logarithmic scale.

| Outcome and model    | Residential distance to major roadways <sup>c</sup><br>(per doubling of increase in distance) | Residential distance to major roadways <sup>c</sup><br>(per 150-m increase in distance) |
|----------------------|-----------------------------------------------------------------------------------------------|-----------------------------------------------------------------------------------------|
| <b>CIMT</b>          |                                                                                               |                                                                                         |
| Model 1 <sup>a</sup> | -0.36% (-0.85, 0.13)                                                                          | -0.016% (-0.045, 0.014)                                                                 |
| Model 2 <sup>b</sup> | -0.17% (-0.72, 0.38)                                                                          | -0.011% (-0.045, 0.022)                                                                 |
| Model 3 <sup>c</sup> | -0.12% (-0.69, 0.46)                                                                          | -0.007% (-0.042, 0.028)                                                                 |
| Model 4 <sup>d</sup> | -0.05% (-0.64, 0.53)                                                                          | -0.0008% (-0.036, 0.034)                                                                |
| <b>PAD</b>           |                                                                                               |                                                                                         |
| Model 1 <sup>a</sup> | 1.02 (0.97, 1.06)                                                                             | 1.00 (0.99, 1.004)                                                                      |
| Model 2 <sup>b</sup> | 1.01 (0.95, 1.06)                                                                             | 1.00 (0.99, 1.003)                                                                      |
| Model 3 <sup>c</sup> | 0.99 (0.94, 1.05)                                                                             | 0.99 (0.99, 1.003)                                                                      |
| Model 4 <sup>d</sup> | 0.99 (0.94, 1.05)                                                                             | 0.99 (0.99, 1.003)                                                                      |
| <b>CAC</b>           |                                                                                               |                                                                                         |
| Model 1 <sup>a</sup> | 0.98 (0.95, 1.01)                                                                             | 0.999 (0.997, 1.001)                                                                    |
| Model 2 <sup>b</sup> | <b>0.96 (0.93, 0.99)</b>                                                                      | <b>0.997 (0.995, 0.999)</b>                                                             |
| Model 3 <sup>c</sup> | 0.97 (0.94, 1.01)                                                                             | <b>0.997 (0.995, 0.999)</b>                                                             |
| Model 4 <sup>d</sup> | 0.97 (0.94, 1.01)                                                                             | 0.998 (0.995, 1.00004)                                                                  |
| <b>AAC</b>           |                                                                                               |                                                                                         |
| Model 1 <sup>a</sup> | 1.01 (0.99, 1.03)                                                                             | 1.00 (0.99, 1.001)                                                                      |
| Model 2 <sup>b</sup> | 0.99 (0.97, 1.02)                                                                             | 1.00 (0.99, 1.001)                                                                      |
| Model 3 <sup>c</sup> | 0.99 (0.97, 1.02)                                                                             | 1.00 (0.99, 1.002)                                                                      |
| Model 4 <sup>d</sup> | 0.99 (0.97, 1.02)                                                                             | 1.00 (0.99, 1.002)                                                                      |

<sup>a</sup> Adjusted for age (natural spline, 3 df) and sex.

<sup>b</sup> Additionally adjusted for household income, education, and neighborhood socioeconomic status.

<sup>c</sup> Additionally adjusted for BMI (natural spline, 3 df), smoking, physical activity (natural spline, 3 df), alcohol consumption, history of self-reported and physician-diagnosed coronary heart disease (CHD), myocardial infarction (MI), stroke and carotid angioplasty, and neighborhood food environment (number of fast food restaurants or grocery store within 1.5 miles from residence).

<sup>d</sup> Additionally adjusted for diabetes mellitus, hypertension, and hyperlipidemia

<sup>e</sup> Nearest major roadways = A1 roads.

Web Table 4: Association between categories of residential distance to nearest major roadways (A1/A2) and carotid intima-media thickness (CIMT) and presence of peripheral arterial disease (PAD) at baseline, and presence of coronary artery calcification (CAC) or aortic artery calcification (AAC) at first follow-up, among participants free of history of self-reported and physician-diagnosed coronary heart disease (CHD), stroke and carotid angioplasty. Estimates represent the relative percent difference in CIMT (95% CI) modeled as a continuous outcome, and prevalence ratios (95% CI) of PAD, CAC or AAC modeled as categorical outcomes.

| Outcome              | Residential distance to major roadways <sup>e</sup> |                     |                   | <i>P</i> <sub>trend</sub> |
|----------------------|-----------------------------------------------------|---------------------|-------------------|---------------------------|
|                      | <150 m                                              | 150-300 m           | >300 m            |                           |
| <b>CIMT</b>          | ( <i>n</i> =91)                                     | ( <i>n</i> =138)    | ( <i>n</i> =4069) |                           |
| Model 1 <sup>a</sup> | <b>4.78% (0.18, 9.59)</b>                           | 0.45% (-3.17, 4.21) |                   | 0.13                      |
| Model 2 <sup>b</sup> | 4.12% (-1.16, 9.68)                                 | 0.37% (-3.63, 4.55) | 0 (Ref.)          | 0.27                      |
| Model 3 <sup>c</sup> | <b>4.74% (0.03, 9.45)</b>                           | 0.30% (-3.83, 4.61) |                   | 0.22                      |
| Model 4 <sup>d</sup> | <b>5.54% (0.07, 11.31)</b>                          | 0.92% (-3.28, 5.31) |                   | 0.11                      |
| <b>PAD</b>           | ( <i>n</i> =82)                                     | ( <i>n</i> =133)    | ( <i>n</i> =3800) |                           |
| Model 1 <sup>a</sup> | 0.89 (0.55, 1.45)                                   | 0.87 (0.61, 1.22)   |                   | 0.42                      |
| Model 2 <sup>b</sup> | 1.04 (0.62, 1.75)                                   | 0.78 (0.50, 1.22)   | 0 (Ref.)          | 0.46                      |
| Model 3 <sup>c</sup> | 1.04 (0.63, 1.73)                                   | 0.85 (0.54, 1.33)   |                   | 0.64                      |
| Model 4 <sup>d</sup> | 1.09 (0.66, 1.82)                                   | 0.82 (0.52, 1.30)   |                   | 0.66                      |
| <b>CAC</b>           | ( <i>n</i> =55)                                     | ( <i>n</i> =79)     | ( <i>n</i> =2418) |                           |
| Model 1 <sup>a</sup> | 0.85 (0.65, 1.12)                                   | 0.80 (0.62, 1.03)   |                   | 0.04                      |
| Model 2 <sup>b</sup> | 0.87 (0.61, 1.24)                                   | 0.80 (0.60, 1.06)   | 0 (Ref.)          | 0.09                      |
| Model 3 <sup>c</sup> | 0.85 (0.58, 1.23)                                   | 0.79 (0.59, 1.06)   |                   | 0.08                      |
| Model 4 <sup>d</sup> | 0.90 (0.61, 1.34)                                   | 0.77 (0.581, 1.03)  |                   | 0.09                      |
| <b>AAC</b>           | ( <i>n</i> =55)                                     | ( <i>n</i> =79)     | ( <i>n</i> =2417) |                           |
| Model 1 <sup>a</sup> | 0.89 (0.75, 1.06)                                   | 0.95 (0.82, 1.11)   |                   | 0.18                      |
| Model 2 <sup>b</sup> | 0.90 (0.73, 1.11)                                   | 1.00 (0.89, 1.20)   | 0 (Ref.)          | 0.85                      |
| Model 3 <sup>c</sup> | 0.90 (0.72, 1.11)                                   | 1.06 (0.91, 1.24)   |                   | 0.99                      |
| Model 4 <sup>d</sup> | 0.91 (0.73, 1.14)                                   | 1.05 (0.90, 1.23)   |                   | 0.99                      |

<sup>a</sup> Adjusted for age (natural spline, 3 df) and sex.

<sup>b</sup> Additionally adjusted for household income, education, and neighborhood socioeconomic status.

<sup>c</sup> Additionally adjusted for BMI (natural spline, 3 df), smoking, physical activity (natural spline, 3 df), alcohol consumption, and neighborhood food environment (number of fast food restaurants or grocery store within 1.5 miles from residence).

<sup>d</sup> Additionally adjusted for diabetes mellitus, hypertension, and hyperlipidemia

<sup>e</sup> Nearest major roadways = A1 or A2 roads.
